# Supplementary material for: Genome-wide association study reveals candidate genes influencing lipids and diterpenes contents in Coffea arabica L
Source: PubMed Central journal article supplement (PMC5764960; doi:10.1038/s41598-017-18800-1), 2018-01-11
Supplement: 41598_2017_18800_MOESM1_ESM.pdf [file 41598_2017_18800_MOESM1_ESM.pdf]

## Genome-wide association study reveals candidate genes influencing lipids and diterpenes contents in *Coffea arabica* L.

Gustavo C. Sant'Ana<sup>1,2,3,6</sup>, Luiz F. P. Pereira<sup>1,3\*</sup>, David Pot<sup>2,6</sup>, Suzana T. Ivamoto<sup>1,4</sup>, Douglas S. Domingues<sup>4</sup>, Rafaelle V. Ferreira<sup>1</sup>, Natalia F. Pagiatto<sup>1</sup>, Bruna S. R. Da Silva<sup>1</sup>, Lívia M. Nogueira<sup>1</sup>, Cintia S. G. Kitzberger<sup>1</sup>, Maria B. S. Scholz<sup>1</sup>, Fernanda F. De Oliveira<sup>1</sup>, Gustavo H. Sera<sup>1</sup>, Lilian Padilha<sup>3</sup>, Jean-Pierre Labouisse<sup>2,6</sup>, Romain Guyot<sup>5</sup>, Pierre Charmetant<sup>2,6</sup>, Thierry Leroy<sup>2,6</sup>

<sup>1</sup>Instituto Agronômico do Paraná, Laboratório de Biotecnologia Vegetal, 86047902, Londrina, PR, Brazil.

<sup>2</sup>CIRAD, UMR AGAP, F-34398 Montpellier, France.

<sup>3</sup>Empresa Brasileira de Pesquisa Agropecuária, 70770901, Brasília, DF, Brazil.

<sup>4</sup>Universidade Estadual Paulista, Instituto de Biociências, 13506900, Rio Claro, SP, Brazil.

<sup>5</sup>IRD, CIRAD, Univ. Montpellier, IPME, BP 64501, 34394, Montpellier, France

<sup>6</sup>AGAP, Univ. Montpellier, CIRAD, INRA, Montpellier SupAgro, Montpellier, France.

\*Corresponding Author: filipe.pereira@embrapa.br

### Supporting information

Additional supporting information may be found in the online version of this article.

Supplementary Table S1. List of 107 *Coffea arabica* accessions analyzed in this study.

Supplementary Table S2. Sample size (N), percentage of polymorphic loci (% P), allele number average (Na), Shannon's information index (I), expected heterozygosity (He), and number of private alleles in each genetic group identified by STRUCTURE analysis using K = 3.

Supplementary Figure S1. Linkage disequilibrium analysis of 107 *Coffea arabica* accessions.

Supplementary Figure S2. GWAS results for lipid content among 107 *Coffea arabica* accessions.

Supplementary Figure S3. GWAS results for cafestol content among 107 *Coffea arabica* accessions.

Supplementary Figure S4. GWAS results for kahweol content among 107 *Coffea arabica* accessions.

Supplementary Figure S5. GWAS results for cafestol/kahweol ratio among 107 *Coffea arabica* accessions.

**Supplementary Table S1.** List of 107 *Coffea arabica* accessions analyzed in this study

| Genotypes | Side of Great Rift Valley | Local, Province                                   | Coordinates   | Sample Characterization        | STRUCTURE Group (K=3) |
|-----------|---------------------------|---------------------------------------------------|---------------|--------------------------------|-----------------------|
| E046      | West                      | Sedecha North of Jimma, Kaffa Jimma               | 7°57N 36°48E  | Naturalized Forest             | Q1                    |
| E047      | West                      | Sedecha North of Jimma, Kaffa Jimma               | 7°57N 36°48E  | Naturalized Forest             | Q1                    |
| E055      | West                      | Bada Buna, Kaffa Jimma                            | 7°4N 38°52E   | Naturalized                    | Q1                    |
| E057      | West                      | Bada Buna, Kaffa Jimma                            | 7°4N 38°52E   | Naturalized                    | Q1                    |
| E061      | West                      | Bada Buna, Kaffa Jimma                            | 7°4N 38°52E   | Naturalized                    | Q1                    |
| E068      | West                      | Saredo, Kaffa Jimma                               | 8°05N 36°53E  | Farm under shade               | Q1                    |
| E071      | West                      | Sedecha North of Jimma, Kaffa Jimma               | 7°57N 36°48E  | Naturalized Forest             | Q1                    |
| E080      | West                      | Cossa Kabenna, Kaffa Jimma                        | 7°58 N 36°53E | Farm                           | Q1                    |
| E081      | West                      | Norte de Ghembi, Kaffa Jimma                      | 8°5N 36°54E   | Naturalized Plants             | Q1                    |
| E126      | West                      | Gorej, Kaffa Jimma                                | 6°42N 35°34E  | NI                             | Q1                    |
| E130      | West                      | Ota, Kaffa Jimma                                  | 7°51N 36°37E  | Farm                           | Q1                    |
| E146      | West                      | Ghera, Illubador                                  | 7°14N 36°24E  | Farm open field                | Q1                    |
| E152      | West                      | Ghera, Illubador                                  | 7°14N 36°24E  | Farm open field                | Q1                    |
| E183      | West                      | Between Agaro y Ghera, Kaffa Jimma                | NI            | Mix cultivated and naturalized | Q1                    |
| E254      | West                      | Chochi, Kaffa Jimma                               | 7°5N 36°45E   | Wet processed                  | Q1                    |
| E279      | West                      | 22 km West of Bonga, Kaffa                        | 7°15N 36°8E   | Farm                           | Q1                    |
| E298      | West                      | North of Ghembi, Kaffa Jimma                      | 8°5N 36°54E   | Naturalized                    | Q1                    |
| E308      | West                      | Doyo, Kaffa Jimma                                 | 7°37N 36°46E  | Farm open field                | Q1                    |
| E315      | West                      | Saredo, Kaffa Jimma                               | 8°05N 36°53E  | Farm under shade               | Q1                    |
| E320      | West                      | Saredo, Kaffa Jimma                               | 8°05N 36°53E  | Farm under shade               | Q1                    |
| E335      | West                      | Ghera, Kaffa Jimma                                | 7°14N 36°24E  | Farm open field                | Q1                    |
| E368      | West                      | Trail to Afallo, Illubador                        | 7°45N 36°18E  | NI                             | Q1                    |
| E370      | West                      | Trail to Afallo, Illubador                        | 7°45N 36°18E  | NI                             | Q1                    |
| E386      | West                      | 5 km North of Afallo, Kaffa Jimma                 | 7°43N 36°18E  | Naturalized                    | Q1                    |
| E389      | West                      | 5 km North of Afallo, Kaffa Jimma                 | 7°43N 36°18E  | Naturalized                    | Q1                    |
| E401      | West                      | Ota, Kaffa Jimma                                  | 7°51N 36°37E  | Farm                           | Q1                    |
| E404      | West                      | Ota, Kaffa Jimma                                  | 7°51N 36°37E  | Farm                           | Q1                    |
| E464      | West                      | 7 km Southeast Teppi, Illubabor                   | NI            | Forest                         | Q1                    |
| E467      | West                      | 10 Km southwest Agaro, Fichi Village, Kaffa Jimma | 7°39N 36°33E  | Farm                           | Q1                    |
| E478      | West                      | Norte de Ghembi, Kaffa Jimma                      | 8°5N 36°54E   | Naturalized Plants             | Q1                    |
| E481      | West                      | Norte de Ghembi, Kaffa Jimma                      | 8°5N 36°54E   | Naturalized Plants             | Q1                    |
| E490      | West                      | Norte de Ghembi, Kaffa Jimma                      | 8°5N 36°54E   | Naturalized Plants             | Q1                    |
| E494      | West                      | Cossa Kabenna, Kaffa Jimma                        | 7°58 N 36°53E | Farm                           | Q1                    |
| E340      | West                      | Ghera, Kaffa Jimma                                | 7°14N 36°24E  | Farm open field                | Q1                    |
| E025      | East                      | NI                                                | NI            | NI                             | Q1                    |
| SEL106    | NI                        | NI                                                | NI            | NI                             | Q1                    |
| E017      | East                      | Wanago, Sidamo                                    | 6°20N 38°15E  | Wet processed                  | Q2                    |
| E018      | East                      | Yirga Cheffe, Sidamo                              | 6°12N 38°13E  | Farm under shade               | Q2                    |
| E021      | East                      | Camino a Soddu, Sidamo                            | 7°8N 37°58E   | Farm open field                | Q2                    |
| E037      | East                      | Wondo Genet, Shoa                                 | 7°7N 38°40E   | Farm open field                | Q2                    |

|         |      |                                          |              |                        |    |
|---------|------|------------------------------------------|--------------|------------------------|----|
| E237    | East | Between Yirgalem y Bira, Sidamo          | NI           | Farm                   | Q2 |
| E039    | West | Chochi, Kaffa Jimma                      | 7°50N 36°45E | Wet processed          | Q2 |
| E085    | West | Trail Gera to Afallo, Illubador          | 7°45N 36°18E | Farm open field        | Q2 |
| E174    | West | SouthWest of Suntu, Kaffa Jimma          | 8°8N 36°53E  | Farm                   | Q2 |
| E213    | West | Teppi, Illubabor                         | 7°9N 35°18E  | Forest Mix             | Q2 |
| E261    | West | Doyo, Kaffa Jimma                        | 7°37N 36°46E | Farm open field        | Q2 |
| E265    | West | Balt, Kaffa Jimma                        | NI           | Shade                  | Q2 |
| E267    | West | Balt, Kaffa Jimma                        | NI           | Shade                  | Q2 |
| E270    | West | Kursi in Chersi, Kaffa Jimma             | 6°10N 30°33E | Shade                  | Q2 |
| E283    | West | Wush Wush, Kaffa Jimma                   | 7°15N 36°8E  | Farm                   | Q2 |
| E302    | West | Doyo, Kaffa Jimma                        | 7°37N 36°46E | Farm open field        | Q2 |
| E327    | West | Ghera, Kaffa Jimma                       | 7°14N 36°24E | Farm open field        | Q2 |
| E332    | West | Ghera, Kaffa Jimma                       | 7°14N 36°24E | Farm open field        | Q2 |
| E383    | West | Afallo trail; Kaffa Jimma                | 7°43N 36°18E | Trail                  | Q2 |
| E408    | West | Between Bonga and Wush Wush, Kaffa Jimma | 7°15N 36°13E | Wet processed          | Q2 |
| E409    | West | Between Bonga and Wush Wush, Kaffa Jimma | 7°15N 36°13E | Wet processed          | Q2 |
| E419    | West | Bonga, Kaffa Jimma                       | 7°15N 36°13E | Cultivated             | Q2 |
| M7846   | West | NI                                       | NI           | Cultivated             | Q2 |
| Bourbon |      | NI                                       | NI           | Cultivated             | Q2 |
| M_Novo  |      | NI                                       | NI           | Cultivated             | Q2 |
| Typica  |      | NI                                       | NI           | Cultivated             | Q2 |
| E114    | West | Mizan Tefari, Kaffa Jimma                | 6°55N 35°25E | Farm open field        | Q3 |
| E116    | West | Ainamba, Kaffa Jimma                     | 6°35N 35°28E | Naturalized Under tree | Q3 |
| E118    | West | Korcha, Illubabor                        | 7°8N 35°24E  | Rain forest            | Q3 |
| E124    | West | Geisha, Kaffa Jimma                      | 6°38N 35°30E | Forest                 | Q3 |
| E189    | West | Teppi, Illubabor                         | 7°9N 35°18E  | Forest Mix             | Q3 |
| E199    | West | Teppi, Illubabor                         | 7°9N 35°18E  | Forest Mix             | Q3 |
| E201    | West | Teppi, Illubabor                         | 7°9N 35°18E  | Forest Mix             | Q3 |
| E208    | West | Teppi, Illubabor                         | 7°9N 35°18E  | Forest Mix             | Q3 |
| E209    | West | Teppi, Illubabor                         | 7°9N 35°18E  | Forest Mix             | Q3 |
| E218    | West | Teppi, Illubabor                         | 7°9N 35°18E  | Forest Mix             | Q3 |
| E220    | West | Teppi, Illubabor                         | 7°9N 35°18E  | Forest Mix             | Q3 |
| E325    | West | Ghera, Kaffa Jimma                       | 7°14N 36°24E | farm open field        | Q3 |
| E439    | West | 8 km East of Teppii, Illubabor           | 7°10N 35°18E | Forest                 | Q3 |
| E450    | West | 8 km East of Teppii, Illubabor           | 7°10N 35°18E | Forest                 | Q3 |
| E454    | West | 10 km Southeast Teppii, Illubabor        | 7°9N 35°22E  | Forest                 | Q3 |
| E456    | West | 10 km Southeast Teppii, Illubabor        | 7°9N 35°22E  | Forest                 | Q3 |
| E457    | West | 10 km Southeast Teppii, Illubabor        | 7°9N 35°22E  | Forest                 | Q3 |
| E458    | West | 10 km Southeast Teppii, Illubabor        | 7°9N 35°22E  | Forest                 | Q3 |
| E466    | West | 7 km Southeast Teppii, Illubabor         | NI           | Forest                 | Q3 |
| E511    | West | Ainamba, Kaffa Jimma                     | 6°53N 35°28E | Naturalized            | Q3 |
| E514    | West | Ainamba, Kaffa Jimma                     | 6°53N 35°28E | Naturalized            | Q3 |
| E516    | West | Tunteta, Kaffa Jimma                     | 6°52N 35°27E | Cultivated             | Q3 |
| E571    | West | Zeghie, Gojjam                           | 11°42N 37°20 | Cultivated in Forest   | Q3 |

|       |      |                                     |              |                      |    |
|-------|------|-------------------------------------|--------------|----------------------|----|
| E621  | West | Tunteta, Kaffa Jimma                | 6°52N 35°27E | Cultivated           | Q3 |
| E238  | East | Aleta Wondo Colla, Sidamo           | NI           | Farm                 | M  |
| E041  | West | 49 Km North of Jimma, Kaffa Jimma   | 7°57N 36°48E | Naturalized          | M  |
| E044  | West | 49 Km North of Jimma, Kaffa Jimma   | 7°57N 36°48E | Naturalized          | M  |
| E087  | West | Edge Gera Village, Kaffa Jimma      | 7°14N 36°24E | Farm open field      | M  |
| E123a | West | Beru, Kaffa Jimma                   | 6°15N 35°14  | Forest               | M  |
| E123b | West | Beru, Kaffa Jimma                   | 6°15N 35°14  | Forest               | M  |
| E131  | West | Ota, Kaffa Jimma                    | 7°51N 36°37E | Farm                 | M  |
| E148  | West | Ghera, Illubador                    | 7°14N 36°24E | Farm open field      | M  |
| E159  | West | Ghera, Illubador                    | 7°14N 36°24E | Farm open field      | M  |
| E221  | West | Cerca de Teppi, Illubabor           | 7°9N 35°18E  | Forest Mix           | M  |
| E268  | West | Trail to Afallo, Illubador          | 7°45N 36°18E | Shade                | M  |
| E272  | West | Kolu, Kaffa Jimma                   | 6°95N 35°18E | NI                   | M  |
| E287  | West | Shebe, Kaffa Jimma                  | NI           | NI                   | M  |
| E301  | West | Doyo, Kaffa Jimma                   | 7°37N 36°46E | Farm open field      | M  |
| E324  | West | Suntu, Kaffa Jimma                  | NI           | NI                   | M  |
| E326  | West | Ghera, Kaffa Jimma                  | 7°14N 36°24E | Farm open field      | M  |
| E331  | West | Ghera, Kaffa Jimma                  | 7°14N 36°24E | Farm open field      | M  |
| E364  | West | Trail to Afallo, Illubador          | 7°45N 36°18E | Trail                | M  |
| E486  | West | 18 Km North of Ghembji, Kaffa Jimma | 8°5N 36°54E  | Naturalized Plants   | M  |
| E546  | West | Wush Wush, Kaffa Jimma              | 7°15N 36°8   | Farm                 | M  |
| E552  | West | Wush Wush, Kaffa Jimma              | 7°15N 36°8   | Farm                 | M  |
| E565  | West | Zeghie, Gojjam                      | 11°42N 37°20 | Cultivated in Forest | M  |

**Supplementary Table S2.** Sample size (N), percentage of polymorphic loci (% P), allele number average (Na), Shannon's information index (I), expected heterozygosity (He), and number of private alleles in each group identified by STRUCTURE analysis considering K = 3

| <b>Group</b> | <b>N</b> | <b>% P</b> | <b>Na</b> | <b>I</b> | <b>He</b> | <b>Private alleles</b> |
|--------------|----------|------------|-----------|----------|-----------|------------------------|
| Q1           | 36       | 97.37      | 1.97      | 0.53     | 0.36      | 11                     |
| Q2           | 25       | 97.30      | 1.97      | 0.54     | 0.37      | 15                     |
| Q3           | 24       | 93.36      | 1.93      | 0.51     | 0.35      | 6                      |
| M            | 22       | 99.34      | 1.99      | 0.55     | 0.37      | 0                      |
| Total        | 107      | 96.85      | 1.97      | 0.53     | 0.36      | 32                     |

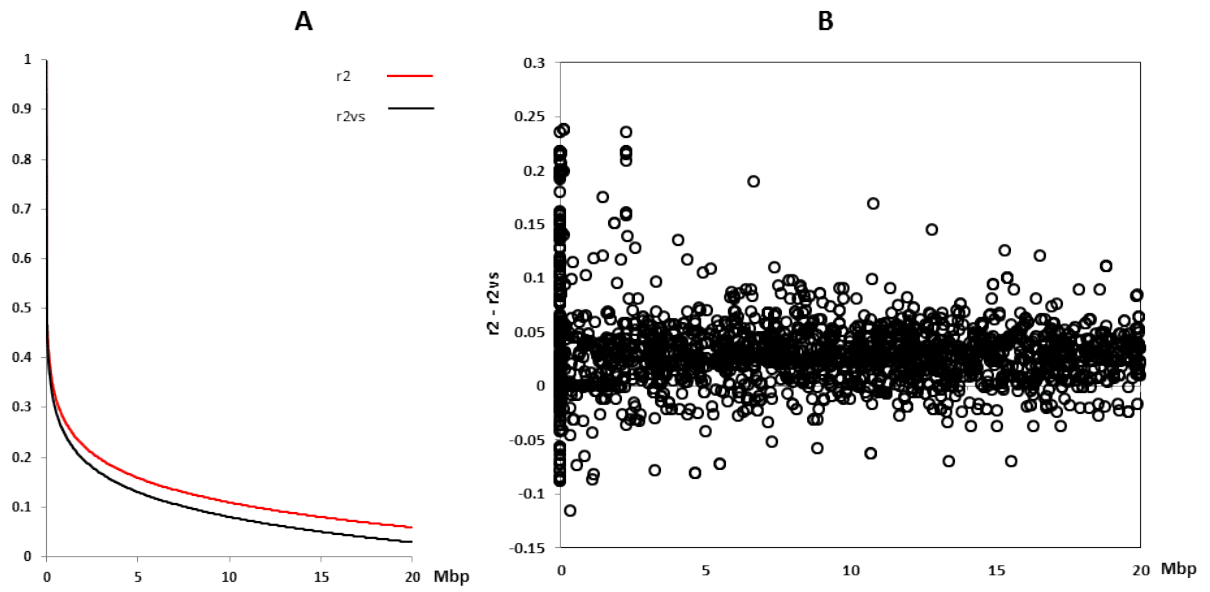

**Supplementary Figure S1.** Linkage disequilibrium analysis of 107 *Coffea arabica* accessions. (A) LD decay (measured by  $r^2$  and  $r^2_{vs}$ ) as a function of genetic distance between SNPs markers, and (B) difference between estimated  $r^2$  and  $r^2_{vs}$  as a function of physical distance between pairs of loci (in Mbp).

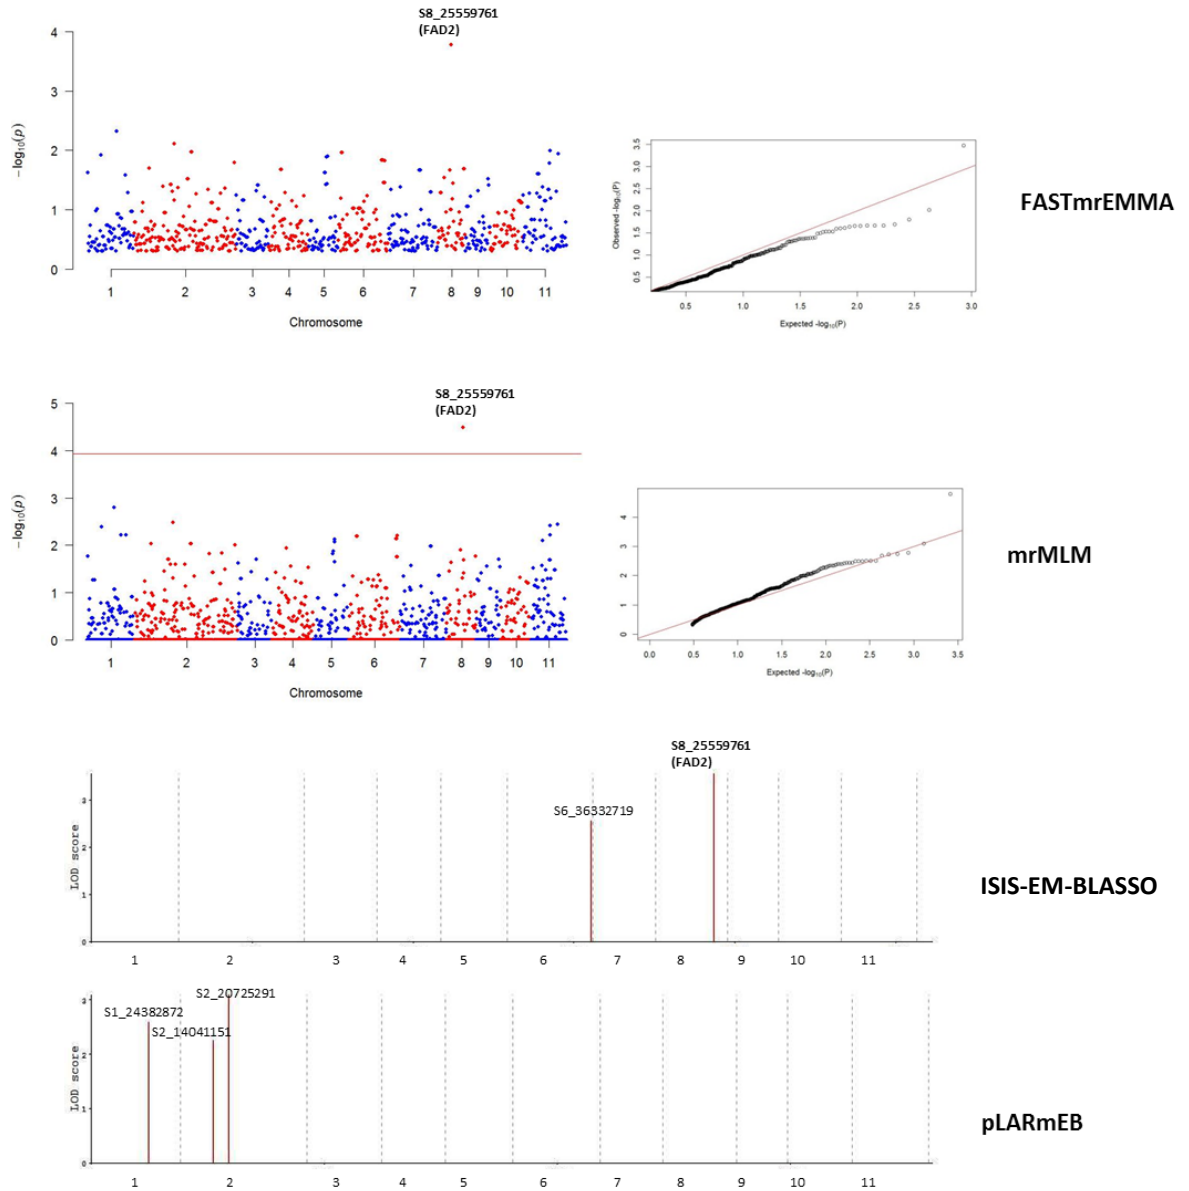

**Supplementary Figure S2** – Manhattan plots and Q-Q plots showing GWAS results for lipid beans content among 107 *Coffea arabica* accessions using mrMLM and FASTmrEMMA methods, and LOD score plots representing results using ISIS-EM-BLASSO and pLARmEB methods.

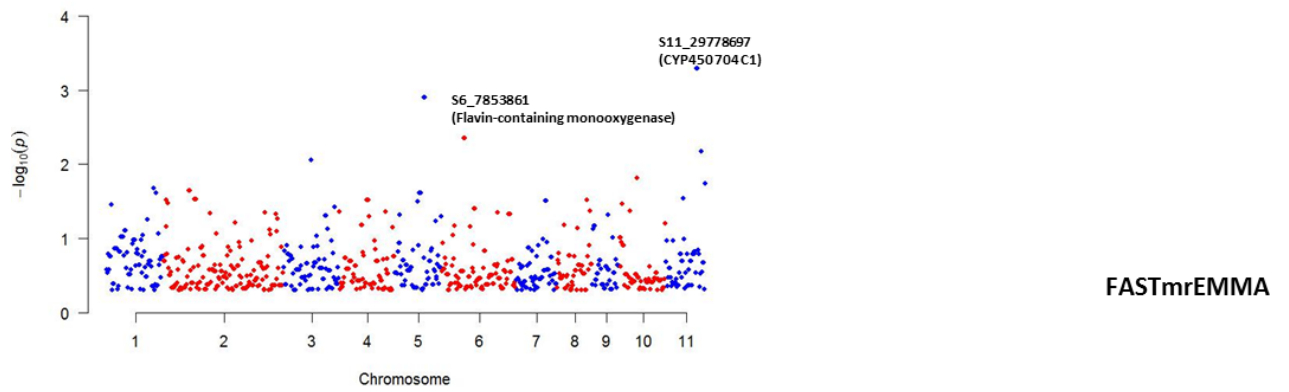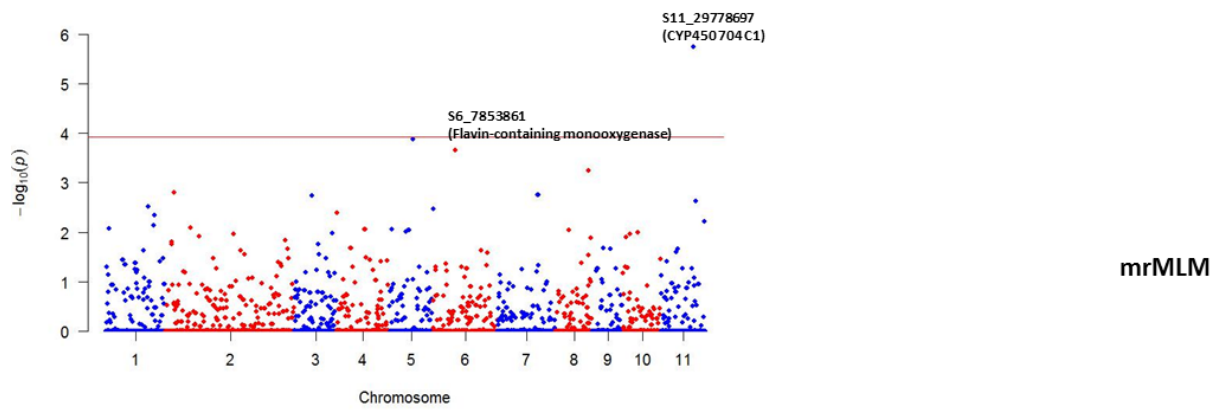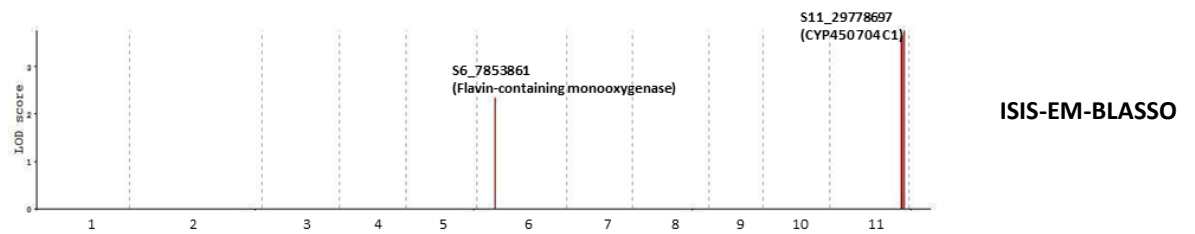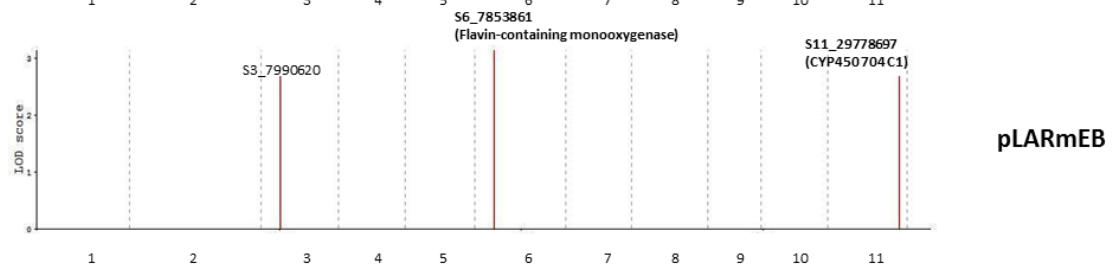

**Supplementary Figure S3.** Manhattan plots and Q-Q plots showing GWAS results for cafestol beans content among 107 *Coffea arabica* accessions using mrMLM and FASTmrEMMA methods, and LOD score plots representing results using ISIS-EM-BLASSO and pLARM EB methods.



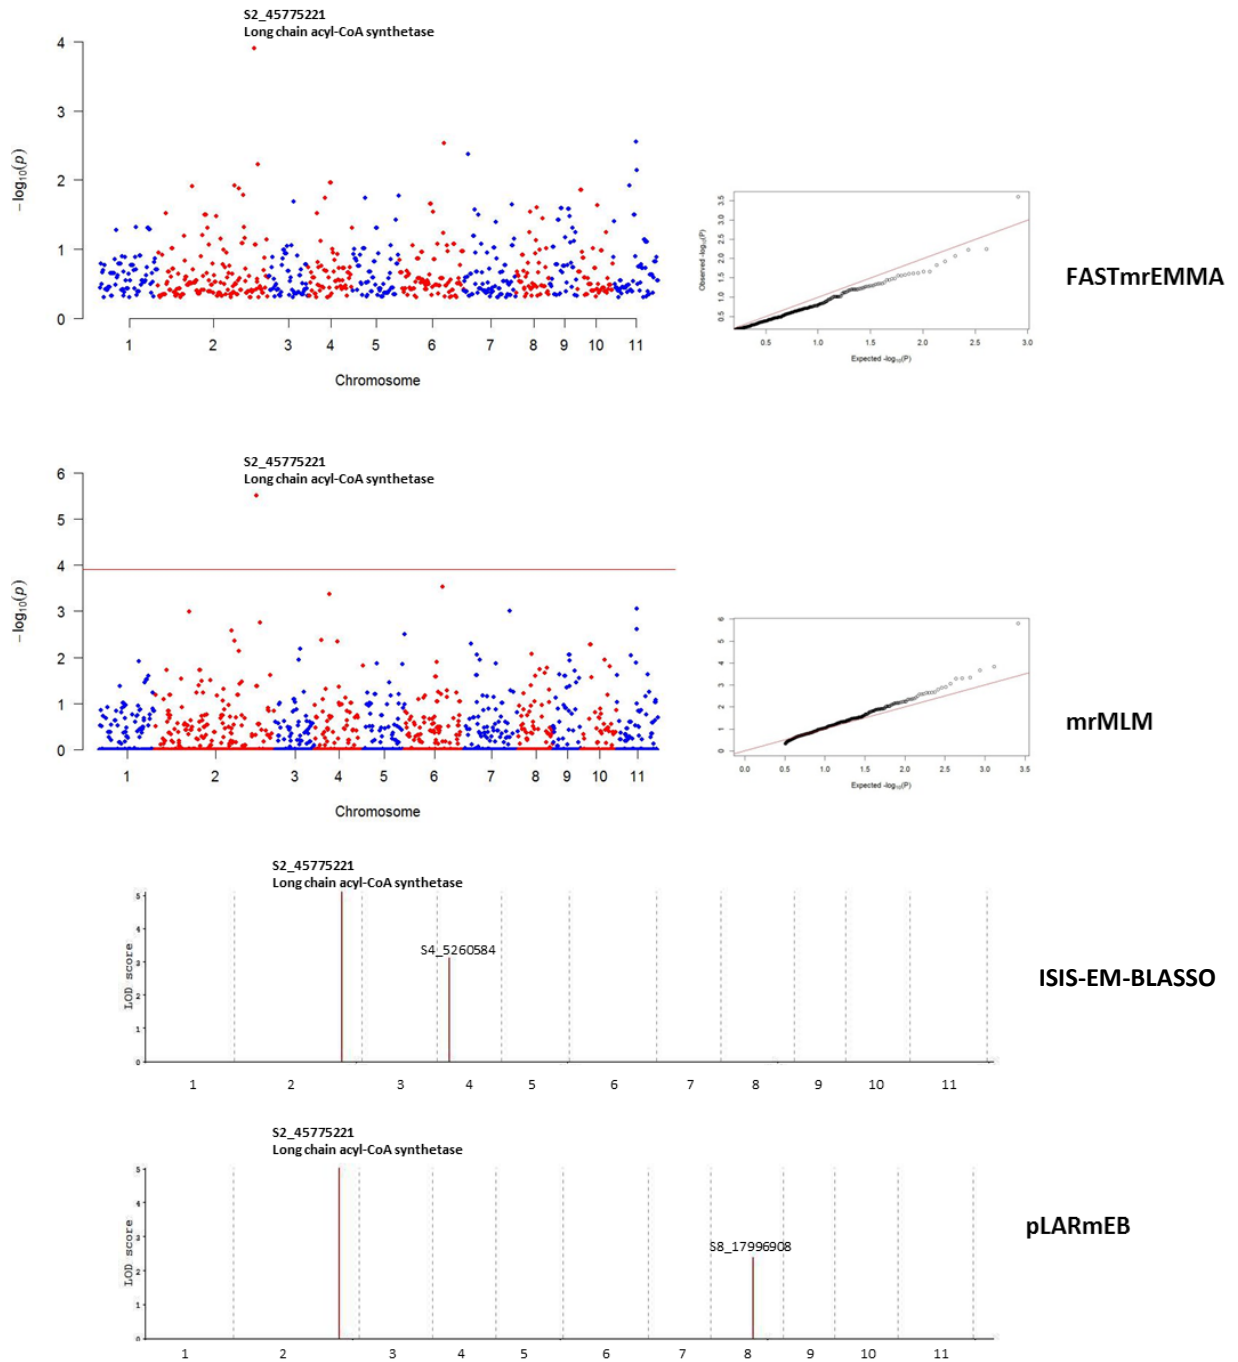

**Supplementary Figure S4.** Manhattan plots and Q-Q plots showing GWAS results for kahweol beans content among 107 *Coffea arabica* accessions using mrMLM and FASTmrEMMA methods, and LOD score plots representing results using ISIS-EM-BLASSO and pLARmEB methods.

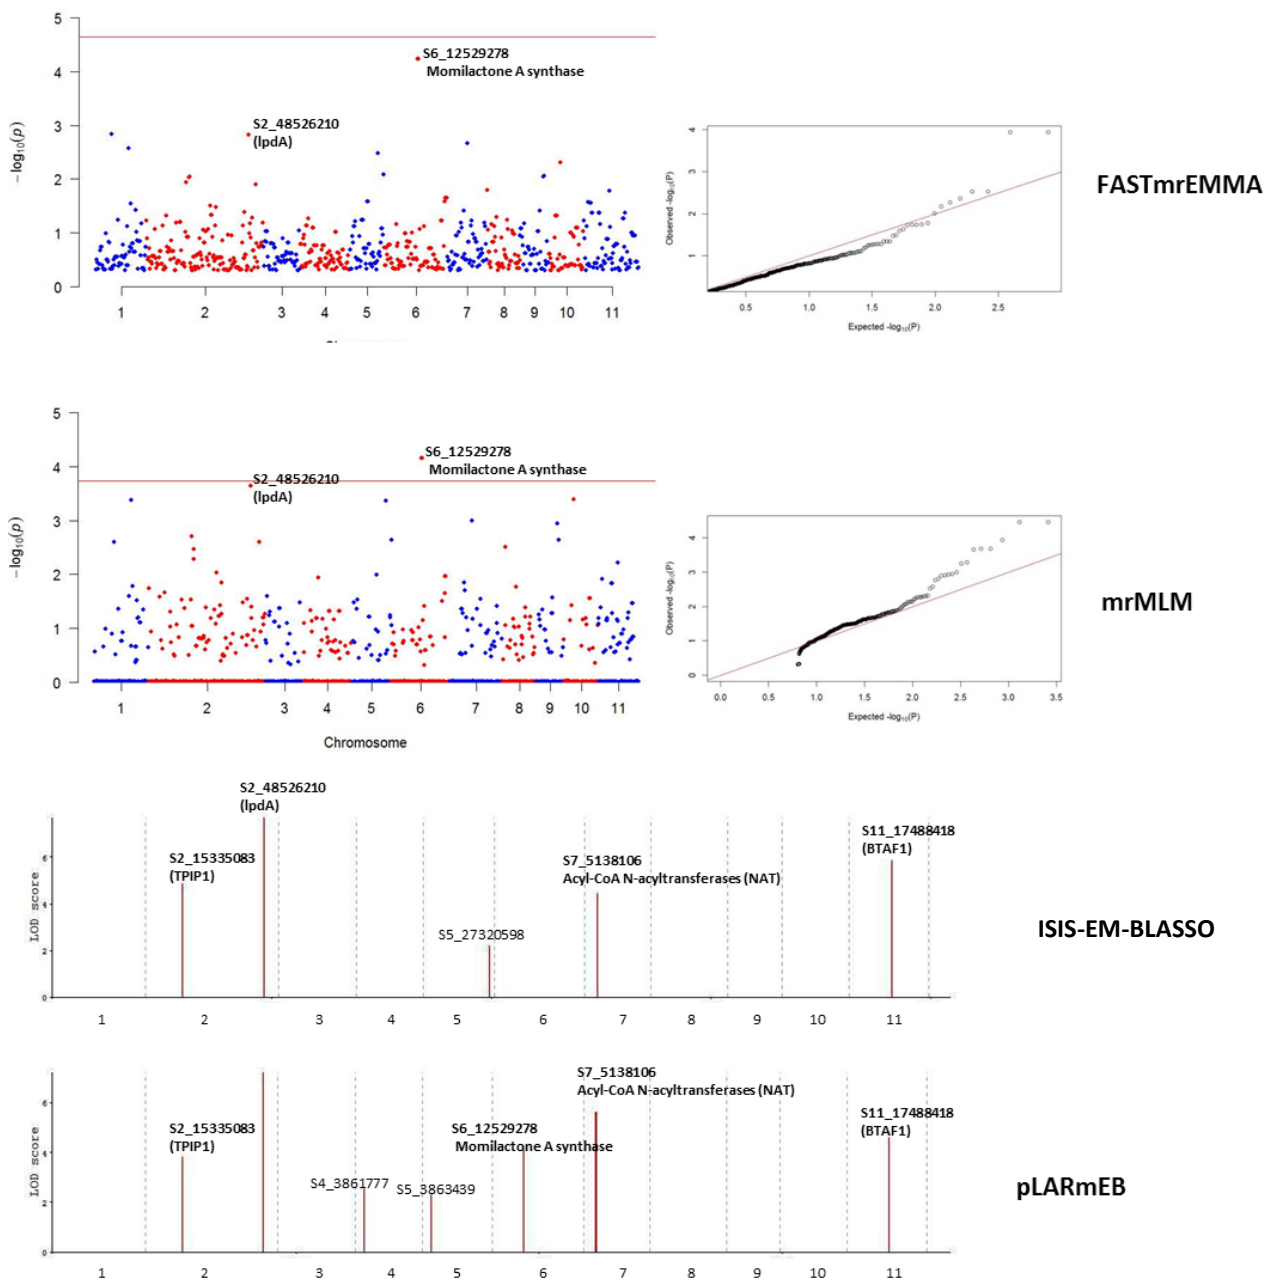

**Supplementary Figure S5.** Manhattan plots and Q-Q plots showing GWAS results for cafestol/kahweol ratio among 107 *Coffea arabica* accessions using mrMLM and FASTmrEMMA methods, and LOD score plots representing results using ISIS-EM-BLASSO and pLARmEB methods.
